# Supplementary material for: UV-light-assisted green preparation of Bi/BiOBr/RGO composites with oxygen vacancies toward enhanced photocatalytic removal of organic dye
Source: Royal Society of Chemistry journal article supplement (doi:10.1039/d0nj01296c), 2020-01-01
Supplement: d0nj01296c1.pdf [file d0nj01296c1.pdf]

**Electronic Supplement information**

**UV-light-assisted green preparation of Bi/BiOBr/RGO composites with oxygen vacancies toward enhanced photocatalytic removal of organic dye**

**Wen Jia,<sup>a, b</sup> Dong Peng,<sup>a</sup> Zijuan Feng,<sup>a, b</sup> Xue Wu,<sup>b</sup> Yi Liu,<sup>b</sup> Xuxu Zheng<sup>b</sup> and**

**Xiaoya Yuan<sup>\*a, b</sup>**

<sup>a</sup> China-Spain Collaborative Research Center for Advanced Materials, Chongqing

Jiaotong University, Chongqing 400074, China

<sup>b</sup> College of Materials Science and Engineering, Chongqing Jiaotong University,

Chongqing 400074, China

**\*Corresponding author:**

China-Spain Collaborative Research Center for Advanced Materials, College of

Materials Science and Engineering, Chongqing Jiaotong University, Chongqing

400074, China

Tel.: +86-23-62789154; Fax: +86-23-62789154.

*E-mail address:* yuanxy@cqjtu.edu.cn(X.Y Yuan)

To be published in New Journal of Chemistry

## 1. Experimental Section

### Preparation of the photocatalyst

Synthesis of BiOBr: 2 mmol of  $\text{Bi}(\text{NO}_3)_3 \cdot 5\text{H}_2\text{O}$  was dissolved in 45 mL of distilled water, and magnetically stirred at 10 min., and also stirred at 10 min. Then, another 45 mL of distilled water containing 2 mmol KBr was added drop wise into the above solution, and the mixed solutions was further stirred for 30 min. The reaction solution was transferred into a 100 mL Teflon-lined autoclave and maintained at  $160^\circ\text{C}$  for 12 h. After cooling to room temperature, the resulted precipitates were collected and washed by deionized water and ethanol, respectively, then finally dried at  $60^\circ\text{C}$  for 12 h. And the sample was named as BiOBr.

Synthesis of Bi/BiOBr: 0.1 g of BiOBr was added into 50 mL of ethanol and the mixture solution was exposed to UV-light for 20, 40 and 60 min while stirring, respectively. Afterwards, the precipitate was collected and washed successively by deionized water and ethanol, finally dried at  $60^\circ\text{C}$  for 12 h. The resulting samples were marked as Bi/BiOBr-20, Bi/BiOBr-40 and Bi/BiOBr-60.

## 2. Results and discussion

### 2.1. Characterization of Bi/BiOBr composites

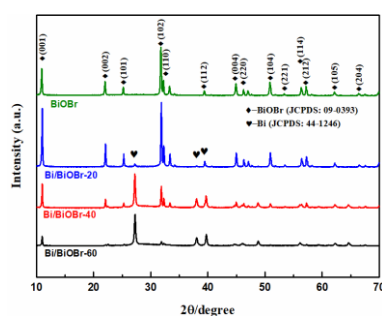

**Fig. S1** XRD patterns of BiOBr, Bi/BiOBr-20, Bi/BiOBr-40 and Bi/BiOBr-60 composites.

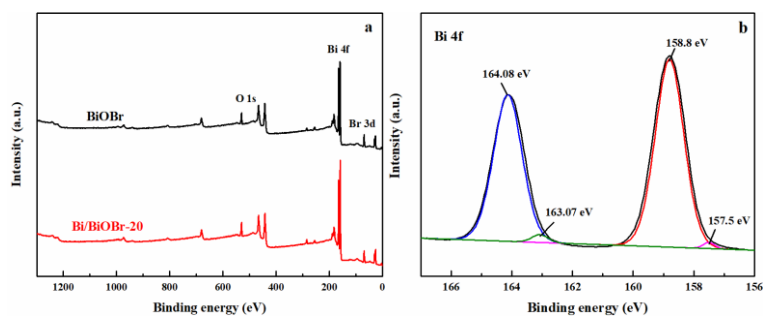

**Fig. S2** XPS spectra of BiOBr and Bi/BiOBr-20 photocatalyst survey pattern (a); Bi 4f (b).

**Table. S1** The chemical contents (%) of BiOBr/RGO and Bi/BiOBr/RGO.

| Name  | BiOBr/RGO | Bi/BiOBr/RGO-40 |
|-------|-----------|-----------------|
| O 1s  | 23.09     | 19.53           |
| C 1s  | 20.74     | 14.66           |
| Bi 4f | 20.30     | 22.73           |
| Br 3d | 35.86     | 43.08           |
